# Supplementary material for: Revisiting the origin of electrochemical activity in the topological semimetal PtGa
Source: Royal Society of Chemistry journal article supplement (doi:10.1039/d6sc03026b), 2026-06-11

**PtGa(100) / PBE**

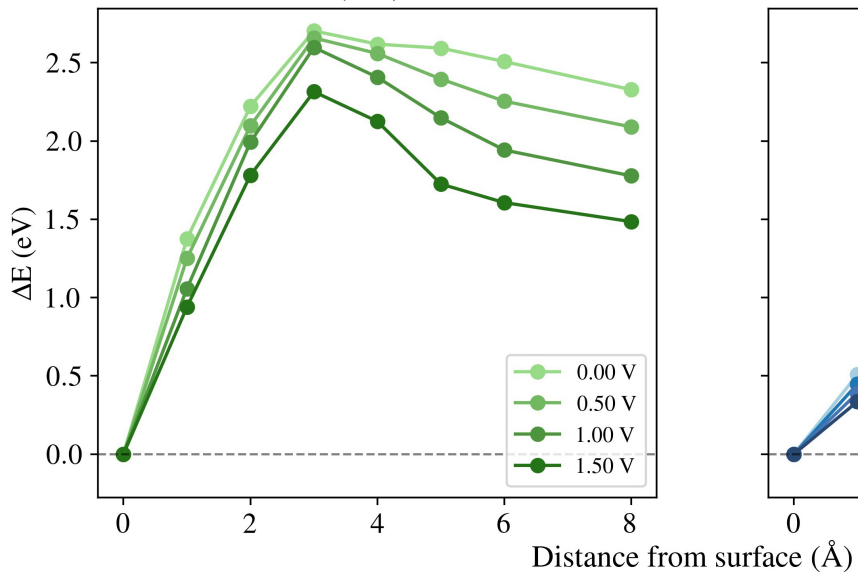

**PtGa(100) / RPBE**

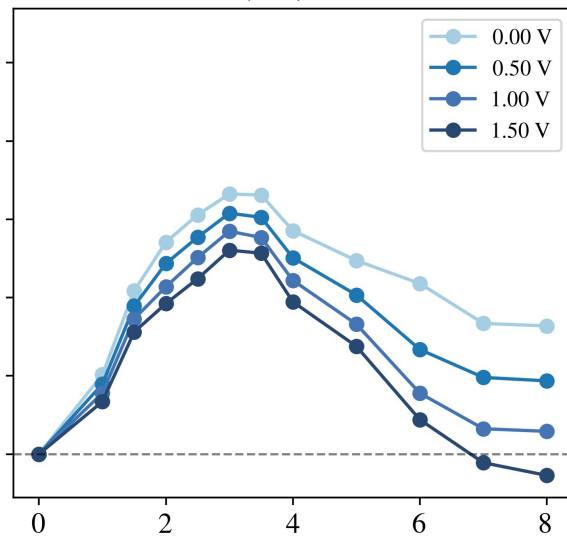

Supplement: d6sc03026b4.pdf [file d6sc03026b4.pdf]
