# Supplementary material for: Revisiting the origin of electrochemical activity in the topological semimetal PtGa
Source: Royal Society of Chemistry journal article supplement (doi:10.1039/d6sc03026b), 2026-06-11

Supplementary Information (SI) for Chemical Science.  
This journal is © The Royal Society of Chemistry 2026

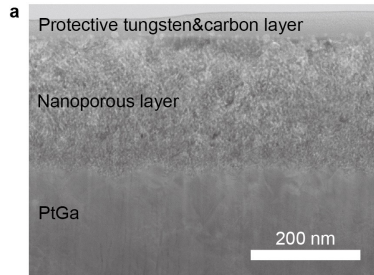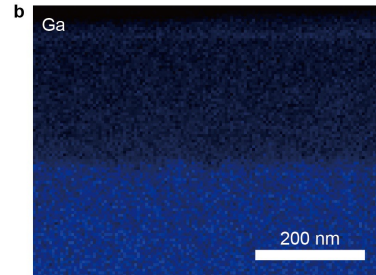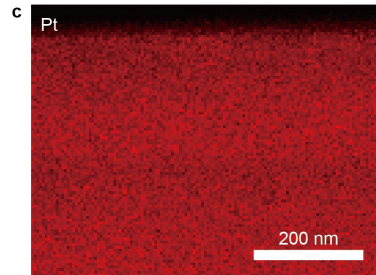

Supplement: d6sc03026b11.pdf [file d6sc03026b11.pdf]
